# Supplementary material for: A novel microscale preparative gel electrophoresis system
Source: Royal Society of Chemistry journal article supplement (doi:10.1039/c6an00780e), 2016-01-01
Supplement: c6an00780e1.pdf [file c6an00780e1.pdf]

**Supporting Information(SI)**

**A novel microscale preparative gel electrophoresis system**

Feiran Hao, Jiabin Li, Rui Zhai, Fenglong Jiao, Yangjun Zhang \*, Xiaohong Qian \*

State Key Laboratory of Proteomics, National Center for Protein Science, Beijing  
Institute of Radiation Medicine, No. 38 Life Science Park Road, Changping District,  
Beijing 102206, China

**Table S1 Protein relative mobility and the RSD values**

| Protein                   | Relative mobility |         |         | RSD(%) |
|---------------------------|-------------------|---------|---------|--------|
|                           | Group 1           | Group 2 | Group 3 |        |
| $\beta$ -galactosidase    | 0.08              | 0.08    | 0.08    | 0.18   |
| BSA                       | 0.16              | 0.18    | 0.15    | 1.4    |
| ovalbumin                 | 0.27              | 0.29    | 0.27    | 1.0    |
| CA                        | 0.47              | 0.48    | 0.46    | 0.84   |
| soybean trypsin inhibitor | 0.68              | 0.70    | 0.69    | 0.78   |
| $\alpha$ -lactalbumin     | 0.88              | 0.89    | 0.89    | 0.54   |

As shown in Table S1, the maximum RSD value was 1.4% and the average RSD value was 0.79%, which indicated a good reproducibility of the protein separation.

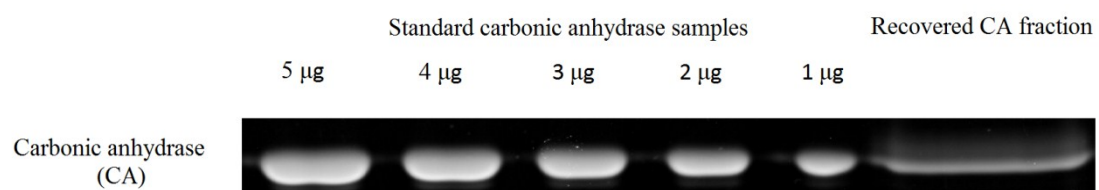

**Fig. S1** Densitometric analysis of recovered CA fraction using the ImageJ software.

**Table S2 Densitometric analysis data**

| Lane number | OD( $\times 10^6$ ) | Protein amount ( $\mu\text{g}$ ) |
|-------------|---------------------|----------------------------------|
| 1           | 1.45                | 5                                |
| 2           | 1.23                | 4                                |
| 3           | 1.01                | 3                                |
| 4           | 0.817               | 2                                |
| 5           | 0.488               | 1                                |
| 6           | 1.37                | 4.59                             |

As shown in Table S2, the OD value ( $y$ ) and the protein amount ( $x$ ) was fitted through linear regression. The regression equation was

$$y \times 10^{-5} = 2.33x + 3.01$$

$$R^2 = 0.990$$

Therefore, protein amount in recovered CA fraction was 4.59  $\mu\text{g}$ .

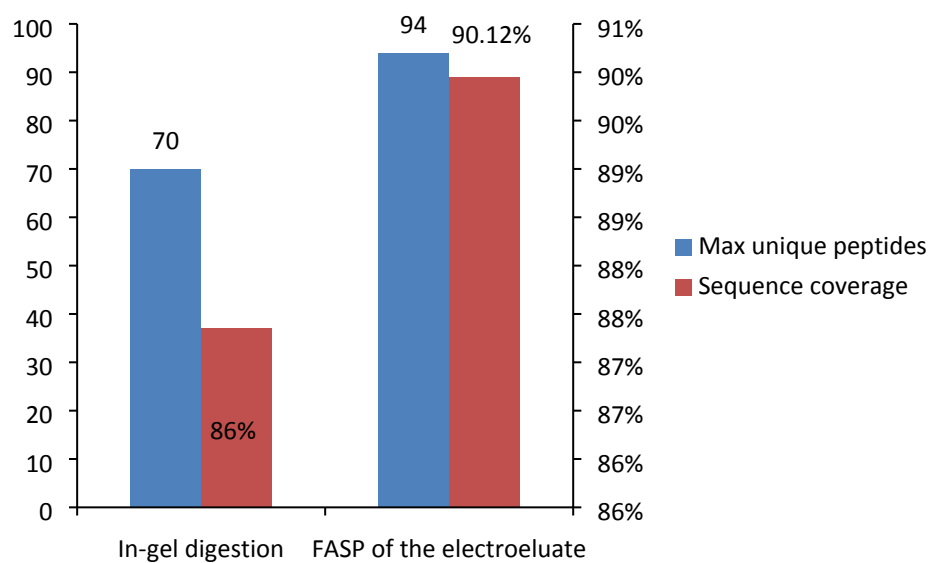

**Fig. S2** Comparison of maximum unique peptides and the average sequence coverage of the in-gel digestion and FASP of the electroeluate.

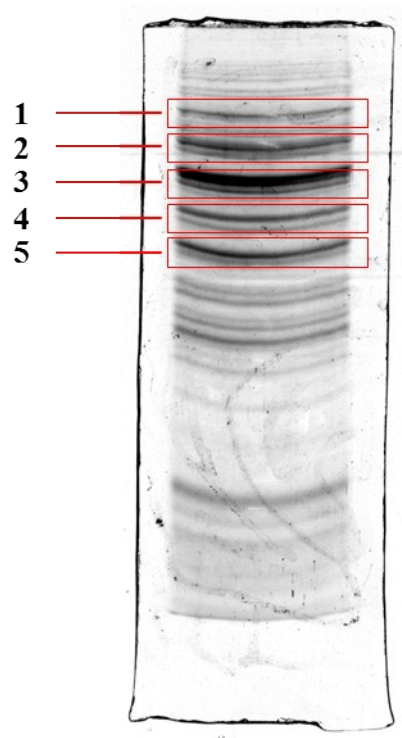

**Fig. S3** Separation of 20  $\mu\text{g}$  of yeast extract using the separation apparatus. The red wireframes represent the eluted/sliced areas.
